# Supplementary material for: Deep Sequencing of the Oral Microbiome Reveals Signatures of Periodontal Disease
Source: PLOS journal article supplement (doi:10.1371/journal.pone.0037919), 2012-06-04
Supplement: S3 (10.1371/journal.pone.0037919.s003) [file journal.pone.0037919.s003]

**Supplementary Table 2. Summary of microbial functions enriched in diseased or control samples.**  
**CLINICAL** – indicates whether enrichment occurs in disease or control samples; **METHOD** – method used to compute significance of enrichment; **SIGNIFICANCE** – Method-specific assessment of the significance of enrichment: for GSEA [2] we report both the p-value and the q-value obtained by correcting for the False Discovery Rate (FDR); for Metapath [3] we report both the raw p-value for enrichment (p-abund) and a p-value corrected for the structure of the metabolic network (p-struc).

| PROCESS                                                        | CLINICAL | METHOD   | SIGNIFICANCE                    |
|----------------------------------------------------------------|----------|----------|---------------------------------|
| <b>LIPID METABOLISM</b>                                        |          |          |                                 |
| FATTY ACID DEGRADATION REGULONS                                | Disease  | GSEA     | P-val=0.000;<br>FDR Q-val=0.001 |
| LIPID A-ARA4N PATHWAY ( POLYMYXIN RESISTANCE )                 | Disease  | GSEA     | P-val=0.000;<br>FDR Q-val=0.006 |
| FATTY ACID METABOLISM                                          | Disease  | Metapath | P-abund=0.001;<br>P-struc=0.001 |
| FATTY ACID BIOSYNTHESIS                                        | Control  | Metapath | P-abund=0.001;<br>P-struc=0.001 |
| GLYCEROPHOPHOLIPID METABOLISM                                  | Disease  | Metapath | P-abund=0.001;<br>P-struc=0.02  |
| <b>AMINO ACID DEGRADATION</b>                                  |          |          |                                 |
| BRANCHED CHAIN AMINO ACID DEGRADATION REGULONS                 | Disease  | GSEA     | P-val=0.000;<br>FDR Q-val=0.000 |
| TRYPTOPHAN CATABOLISM                                          | Disease  | GSEA     | P-val=0.000;<br>FDR Q-val=0.001 |
| AROMATIC AMINO ACID DEGRADATION                                | Disease  | GSEA     | P-val=0.000;<br>FDR Q-val=0.001 |
| CENTRAL META-CLEAVAGE PATHWAY OF AROMATIC COMPOUND DEGRADATION | Disease  | GSEA     | P-val=0.004;<br>FDR Q-val=0.009 |
| HOMOGENITISATE PATHWAY OF AROMATIC COMPOUND DEGRADATION        | Disease  | GSEA     | P-val=0.000;<br>FDR Q-val=0.001 |
| BUTANOATE AND TYROSINE METABOLISM                              | Disease  | Metapath | P-abund=0.02;<br>P-struc=0.03   |
| HOMOSERINE METABOLISM                                          | Control  | Metapath | P-abund=0.001;<br>P-struc=0.001 |
| ASPARTATE AND PURINE METABOLISM                                | Control  | Metapath | P-abund=0.05;<br>P-struc=0.001  |
| <b>NITROGEN METAOBLISM</b>                                     |          |          |                                 |
| DENITRIFICATION                                                | Control  | GSEA     | P-val=0.000;<br>FDR Q-val=0.000 |
| NITRATE AND NITRITE AMMONIFICATION                             | Control  | GSEA     | P-val=0.000;<br>FDR Q-val=0.000 |
| <b>OTHER METABOLIC FUNCTIONS</b>                               |          |          |                                 |
| BENZOATE DEGRIDATION VIA                                       | Disease  | Metapath | P-abund=0.01;                   |

|                                                        |         |      |                                 |
|--------------------------------------------------------|---------|------|---------------------------------|
| HYDROXYLATION                                          |         |      | P-struc=0.03                    |
| DEHYDROGENASE COMPLEXES                                | Control | GSEA | P-val=0.000;<br>FDR Q-val=0.001 |
| TREHALOSE BIOSYNTHESIS                                 | Control | GSEA | P-val=0.000;<br>FDR Q-val=0.001 |
| GLYCEROL FERMENTATION TO 1,3-<br>PROPANEDIOL           | Control | GSEA | P-val=0.000;<br>FDR Q-val=0.001 |
| GLUTATHIONE ANALOGS: MYCOTHIO                          | Control | GSEA | P-val=0.002;<br>FDR Q-val=0.003 |
| PYRUVATE:FERREDOXIN OXIDOREDUCTASE                     | Disease | GSEA | P-val=0.000;<br>FDR Q-val=0.000 |
| POLYHYDROXYBUTYRATE METABOLISM                         | Disease | GSEA | P-val=0.000;<br>FDR Q-val=0.000 |
| ECF CLASS TRANSPORTERS                                 | Disease | GSEA | P-val=0.000;<br>FDR Q-val=0.001 |
| ACETONE BUTANOL ETHANOL SYNTHESIS                      | Disease | GSEA | P-val=0.000;<br>FDR Q-val=0.001 |
| TERMINAL CYTOCHROME O UBIQUINOL<br>OXIDASE             | Disease | GSEA | P-val=0.000;<br>FDR Q-val=0.001 |
| ACETOIN, BUTANEDIOL METABOLISM                         | Control | GSEA | P-val=0.000;<br>FDR Q-val=0.001 |
| PROTocatechuate BRANCH OF BETA-<br>KETOADIPATE PATHWAY | Disease | GSEA | P-val=0.000;<br>FDR Q-val=0.002 |
| PYRIMIDINE UTILIZATION                                 | Disease | GSEA | P-val=0.000;<br>FDR Q-val=0.002 |
| COBALT-ZINC-CADMIUM RESISTANCE                         | Disease | GSEA | P-val=0.000;<br>FDR Q-val=0.003 |
| MERCURY RESISTANCE OPERON                              | Disease | GSEA | P-val=0.000;<br>FDR Q-val=0.006 |
| ACETYL-COA FERMENTATION TO BUTYRATE                    | Disease | GSEA | P-val=0.000;<br>FDR Q-val=0.006 |
| XYLOSE UTILIZATION                                     | Disease | GSEA | P-val=0.000;<br>FDR Q-val=0.007 |
| CATECHOL BRANCH OF BETA-KETOADIPATE<br>PATHWAY         | Disease | GSEA | P-val=0.003;<br>FDR Q-val=0.007 |
| L-ARABINOSE UTILIZATION                                | Disease | GSEA | P-val=0.000;<br>FDR Q-val=0.007 |
| ALKANESULFONATE ASSIMILATION                           | Disease | GSEA | P-val=0.000;<br>FDR Q-val=0.007 |
| <b>NON-METABOLIC FUNCTIONS</b>                         |         |      |                                 |
| WHIB AND WHIB-TYPE REGULATORY<br>PROTEINS              | Control | GSEA | P-val=0.000;<br>FDR Q-val=0.000 |
| BETA-LACTAMASE CLUSTER IN<br>STREPTOCOCCUS             | Control | GSEA | P-val=0.000;<br>FDR Q-val=0.001 |
| FLAVOHAEMOGLOBIN                                       | Control | GSEA | P-val=0.000;<br>FDR Q-val=0.001 |

|                                                       |         |      |                                 |
|-------------------------------------------------------|---------|------|---------------------------------|
| DIVERGENT RNA MODIFICATION RELATED CLUSTERS           | Control | GSEA | P-val=0.000;<br>FDR Q-val=0.001 |
| A GAMMAPROTEOBACTERIA CLUSTER RELATING TO TRANSLATION | Control | GSEA | P-val=0.000;<br>FDR Q-val=0.001 |
| LATE COMPETENCE                                       | Control | GSEA | P-val=0.000;<br>FDR Q-val=0.001 |
| CONJUGATIVE TRANSPOSON,<br>BACTEROIDALES              | Disease | GSEA | P-val=0.000;<br>FDR Q-val=0.000 |
| FLAGELLUM                                             | Disease | GSEA | P-val=0.000;<br>FDR Q-val=0.001 |
| TRANSPOSON RELATED                                    | Disease | GSEA | P-val=0.000;<br>FDR Q-val=0.001 |
| TYPE 4 SECRETION AND CONJUGATIVE TRANSFER             | Disease | GSEA | P-val=0.000;<br>FDR Q-val=0.002 |
